# Supplementary material for: Primary and Immortalized Cultures of Human Proximal Tubule Cells Possess Both Progenitor and Non-Progenitor Cells That Can Impact Experimental Results
Source: MDPI journal article supplement (doi:10.3390/jpm13040613), 2023-03-31
Supplement: s1 [file s1]

# Supplementary Materials:

**Table S1.** List of primers used for qPCR.

| S.N. | Gene Name | Catalog Number | Company    |
|------|-----------|----------------|------------|
| 1    | CLCN7     | qHsaCID0017302 | BIORAD     |
| 2    | NPC2      | qHsaCID0008165 | BIORAD     |
| 3    | LIPA      | QHsaCID0014810 | BIORAD     |
| 4    | RRAGD     | qHsaCID0016675 | BIORAD     |
| 5    | SQSTM1    | qHsaCED0045925 | BIORAD     |
| 6    | LAMP1     | qHsaCID0005925 | BIORAD     |
| 7    | CTSA      | qHsaCED0042210 | BIORAD     |
| 8    | IGF2R     | qHsaCID0018295 | BIORAD     |
| 9    | LGMN      | qHsaCED0042807 | BIORAD     |
| 10   | MCOLN1    | qHsaCID0020976 | BIORAD     |
| 11   | NEU1      | qHsaCED0037311 | BIORAD     |
| 12   | mTOR      | qHsaCED0048371 | BIORAD     |
| 13   | eIF4EBP1  | qHsaCID0005914 | BIORAD     |
| 14   | RAPTOR    | QHsaCID0016865 | BIORAD     |
| 15   | RICTOR    | qHsaCID0007506 | BIORAD     |
| 16   | DEPTOR    | qHsaCID0015181 | BIORAD     |
| 17   | FKBP2     | qHsaCED0020015 | BIORAD     |
| 18   | FKBP11    | qHsaCED0056865 | BIORAD     |
| 19   | TCS1      | qHsaCED0046325 | BIORAD     |
| 20   | MLST8     | qHsaCED0046508 | BIORAD     |
| 21   | RHEB      | qHsaCID0012643 | BIORAD     |
| 22   | LDLR      | qHsaCID0015114 | BIORAD     |
| 23   | FNBP1     | qHsaCID0014809 | BIORAD     |
| 24   | HEXB      | qHsaCID0013279 | BIORAD     |
| 25   | HNF1A     | qHsaCED0001918 | BIORAD     |
| 26   | HNF4G     | qHsaCID0017633 | BIORAD     |
| 27   | HNF4A     | qHsaCID0015879 | BIORAD     |
| 28   | MT2A      |                | Invitrogen |
| 29   | MT1X      |                | Invitrogen |
| 30   | MT1F      |                | Invitrogen |
| 31   | MT1E      |                | Invitrogen |
| 32   | MT1A      |                | Invitrogen |

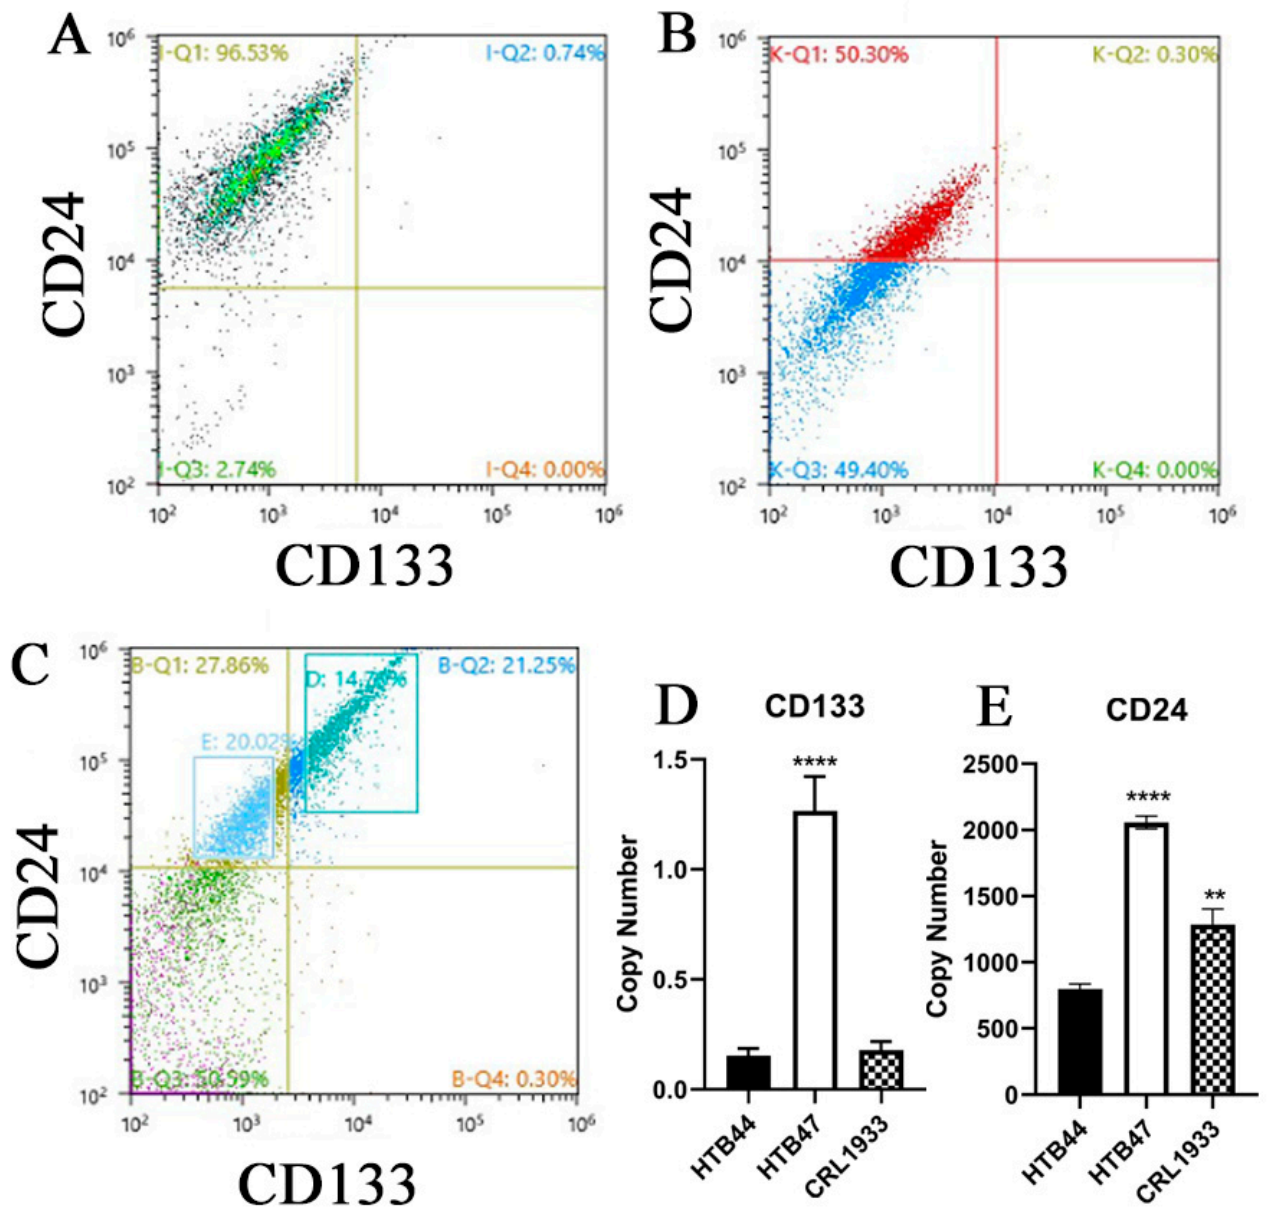

**Figure S1.** Flow cytometry analysis of CD133 and CD24 in RCC cells. The scatter plot XY plot is graphed as CD133 vs CD24 in (A) HTB44; (B) HTB47 and (C) CRL1933 cell lines. RT-qPCR expression of (D) CD133 and (E) CD24 in the RCC cell lines. \*\*\*\*, \*\* indicates significant differences in gene expression level compared to the control 5.5 mM glucose concentration at p-value of  $\leq 0.0001$ ;  $\leq 0.01$  respectively.

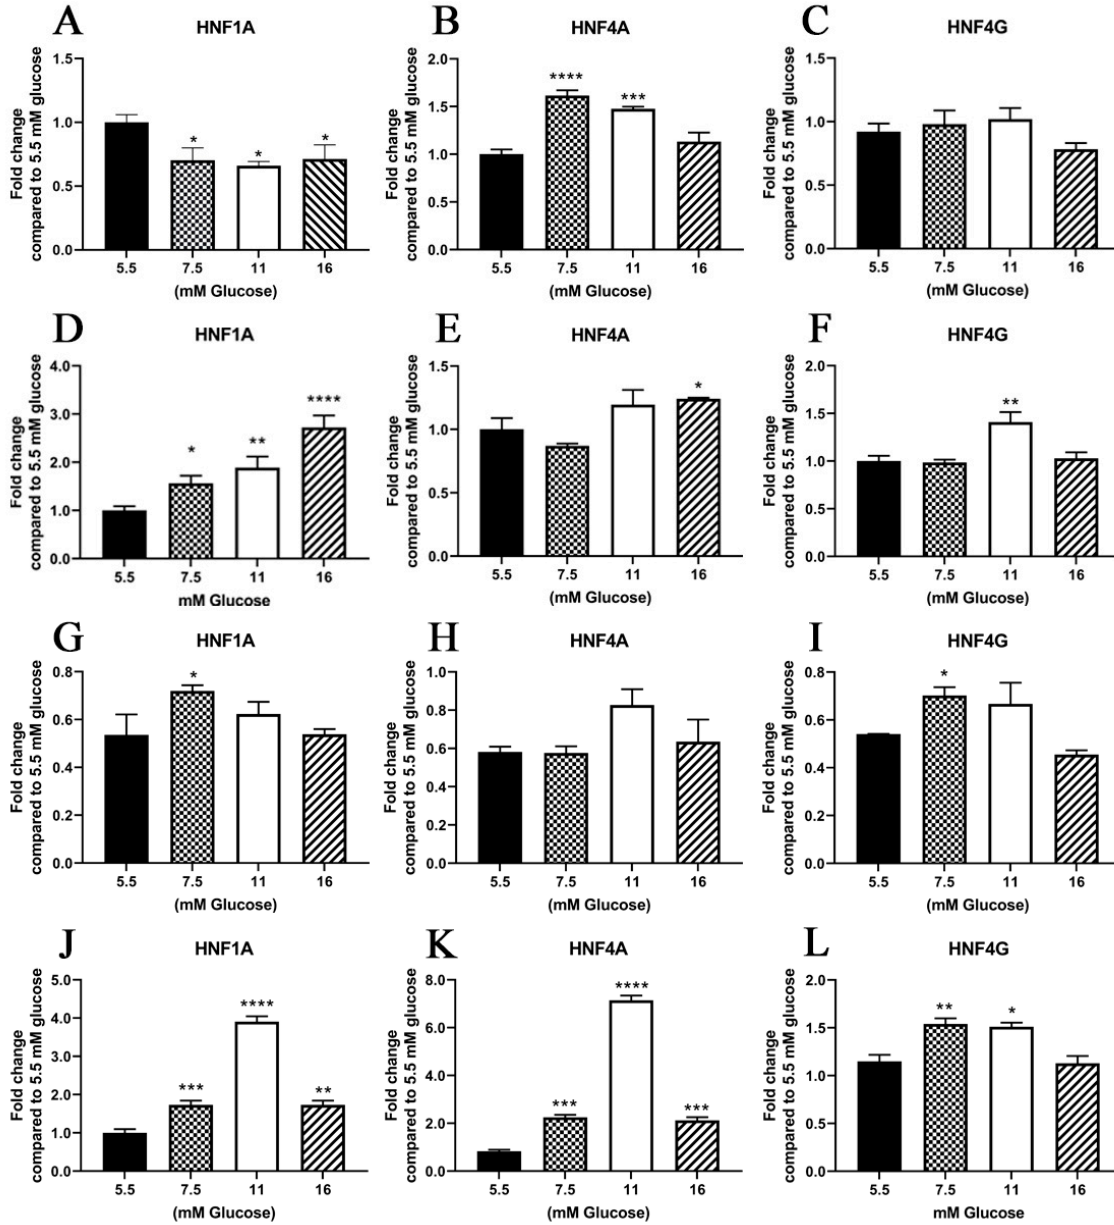

**Figure S2.** Expression of HNF genes in HRTPT and HREC24T cells treated with 5.5 mM, 7.5 mM, 11 mM and 16 mM glucose for 10 passages and 7 passages respectively. HRTPT cells exposed to elevated glucose for 1 and 10 passages, respectively (A) HNF1A; (B) HNF4A; (C) HNF4G and (D) HNF1A; (E) HNF4A; (F) HNF4G. HRECT24t cells exposed to elevated glucose for 1 and 7 passages, respectively (G) HNF1A; (H) HNF4A; (I) HNF4G and (J) HNF1A; (K) HNF4A; (L) HNF4G at passage seven. \*\*\*\*, \*\*\*, \*\*, \* indicates significant differences in gene expression level compared to the control 5.5 mM glucose concentration at p-value of  $\leq 0.0001$ ;  $\leq 0.001$ ;  $\leq 0.01$ ;  $\leq 0.05$  respectively.
